# Supplementary material
Source: MDPI journal article supplement (https://www.mdpi.com/1424-2818/15/8/909)
Supplement: s1 [file s1]

Archive with 3 entries (3 files):
- FigS1.pdf
- Table S7.pdf
- TablesS1-S6.xlsx
