# Supplementary material
Source: MDPI journal article supplement (https://www.mdpi.com/1424-2818/15/8/909)
Supplement: s1 [file s1]

## Supplementary material for the article

# Morphological and molecular evaluation of *Pseudanabaena epilithica* sp. nov. and *P. suomiensis* sp. nov. (Pseudanabaenaceae, Cyanobacteria) From Finland.

Maria Christodoulou\*, Matti Wahlsten and Kaarina Sivonen

Department of Microbiology, Faculty of Agriculture and Forestry, University of Helsinki, P.O. Box 56, 00014, Helsinki, Finland; matti.wahlsten@helsinki.fi (M.W.); kaarina.sivonen@helsinki.fi (K.S.)

\* Correspondence: maria.christodoulou@helsinki.fi

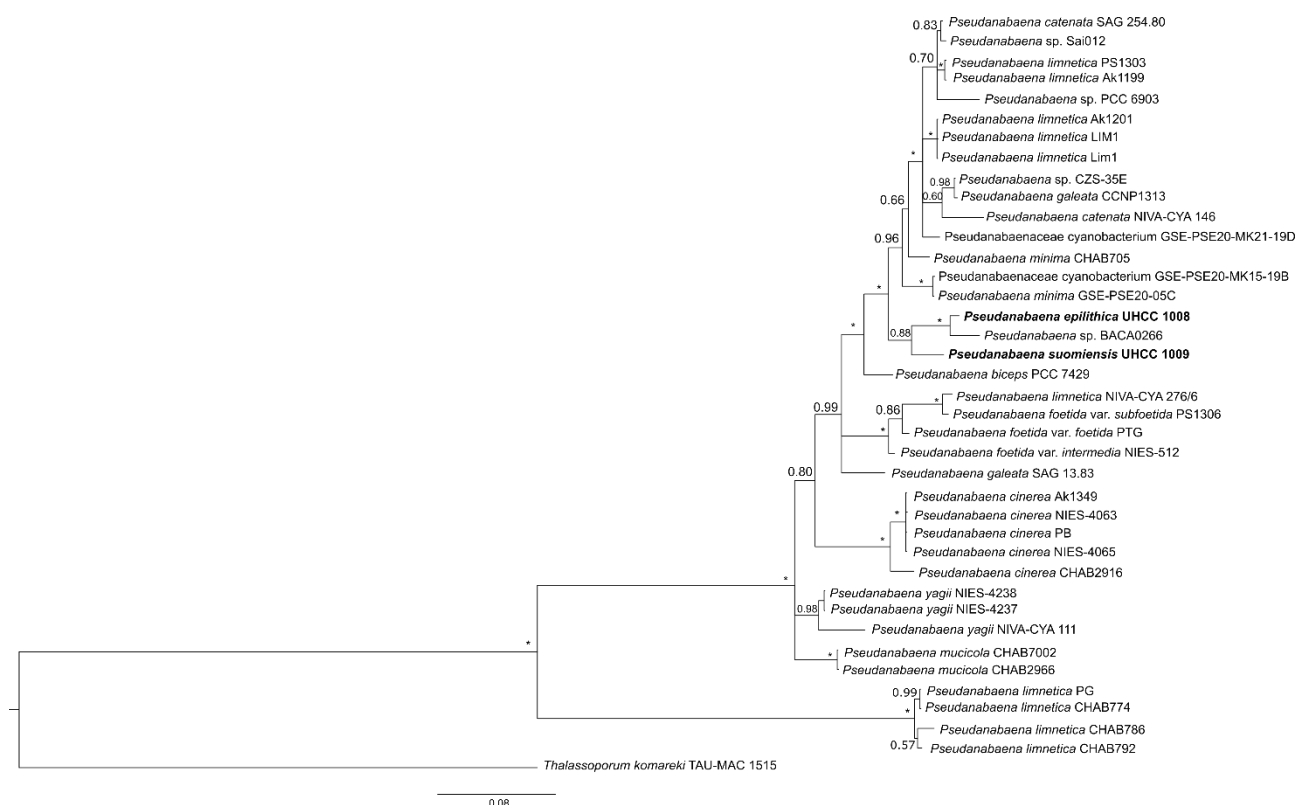

**Figure S1:** Phylogenetic relationships inferred from Bayesian analysis based on a concatenate alignment of 16S rRNA gene and 16S rRNA gene and 16S-23S ITS of *Pseudanabaena* strains. The new species *P. epilithica* UHCC 1008<sup>T</sup> and *P. suomiensis* UHCC 1009<sup>T</sup> are shown in bold. Numbers on nodes correspond to posterior probabilities ( $\geq 0.50$ ). Asterisk (\*) represents support of 1.00. *Thalassosporum komareki* TAU-MAC 1515 was used as the outgroup. GenBank accession numbers of sequences are given in table S3. The scale corresponds to substitutions/site.
