# Supplementary material
Source: MDPI journal article supplement (https://www.mdpi.com/1424-2818/15/8/909)
Supplement: s1 [file s1 › Table S7.pdf]

**Supplementary material for the article**

**Morphological and molecular evaluation of *Pseudanabaena epilithica* sp. nov. and *P. suomiensis* sp. nov. (Pseudanabaenaceae, Cyanobacteria) From Finland.**

**Maria Christodoulou\*, Matti Wahlsten and Kaarina Sivonen**

Department of Microbiology, Faculty of Agriculture and Forestry, University of Helsinki, P.O. Box 56, 00014, Helsinki, Finland; matti.wahlsten@helsinki.fi (M.W.); kaarina.sivonen@helsinki.fi (K.S.)

\* Correspondence: maria.christodoulou@helsinki.fi

**Table S7.** Morphological comparison of the newly described species *P. epilithica* UHCC 1008<sup>†</sup> and *P. suomiensis* UHCC 1009<sup>†</sup> and all taxonomically accepted species of *Pseudanabaena* presented in Komárek and Anagnostidis [1], Skuja [2], Niiyama et al [3], Tuji and Niiyama [4], Kling et al [5] and Turicchia et al [6]. Names of all taxonomically accepted *Pseudanabaena* species have been obtained from AlgaeBase [7]. N/A; not available, –; no

| Species name                                | Macroscopic appearance                                                                                                                                                                                  | Trichome morphology                                                                                                                                             | Constrictions       | Sheaths or envelopes                                     | Vegetative cell color, shape & size (µm)                                                                                                      | Cell content                                                                                                                                | Apical cell                                                                                                                | Motility                                                   | Ecology                                                                                 |
|---------------------------------------------|---------------------------------------------------------------------------------------------------------------------------------------------------------------------------------------------------------|-----------------------------------------------------------------------------------------------------------------------------------------------------------------|---------------------|----------------------------------------------------------|-----------------------------------------------------------------------------------------------------------------------------------------------|---------------------------------------------------------------------------------------------------------------------------------------------|----------------------------------------------------------------------------------------------------------------------------|------------------------------------------------------------|-----------------------------------------------------------------------------------------|
| <i>P. epilithica</i> UHCC 1008 <sup>†</sup> | purple to deep brown-colored irregular clusters, loosely attached to the substrate                                                                                                                      | cylindrical, straight or bent (young trichomes), later long and flexuous, not attenuated towards the end                                                        | constricted         | –                                                        | purple to purple-brown, cylindrical to barrel-shaped<br>W: (1.5) 1.7–1.9 (2.1)<br>L: up to 2.5–3.0 µm long                                    | Differentiated into centro – and chromato- plasma with scarce but prominent granules and/or 1–2 refractive granules (aerotopes?)            | Usually rounded, without calyptra, usually with ring-like or cupola-like large refractive granules                         | infrequent forward movement                                | epilithic, wet rock within a man-made/artificial cavity next to a waterfall             |
| <i>P. suomiensis</i> UHCC 1009 <sup>†</sup> | trichomes are usually arranged in parallel or subparallel fascicles, later forming a thin brownish biofilm, which can be attached firmly to the substrate and/or grow at the liquid media/air interface | cylindrical, mostly straight or slightly bent, usually arranged in parallel or subparallel, not attenuated towards the end, few-celled or up to 200–300 µm long | constricted         | –                                                        | brownish, cylindrical with rounded ends<br>W: (1.5) 1.6–1.9 (2.1)<br>L: up to 3.5                                                             | Differentiated into centro - and chromato- plasma with scarce but prominent granules and/or 1–2 refractive granules (aerotopes?)            | rounded without calyptra or thickened cell wall but with 2 small (or 1 large) ring-like or cupola-like refractive granules | forward movement and clockwise-anticlockwise rotation      | epilithic, dry rock                                                                     |
| <i>P. catenata</i>                          | –                                                                                                                                                                                                       | solitary or aggregated into olive-green or blue-green mats, ± straight, rarely variously bent, flexible, long, not attenuated towards the ends                  | constricted         | –                                                        | blue-green, olive-green, pale greyish to greyish-blue, cylindrical, truncate-rounded at both ends<br>W: 1.2–2.0<br>L: 1.5–3x longer than wide | Homogenous or ± clearly differentiated in centro- and chromato- plasma, without aerotopes                                                   | rounded or slightly conical                                                                                                | characteristically motile without oscillation and rotation | various freshwater and brackish habitats; benthic, epipelagic, sapropelagic, periphytic |
| <i>P. spelaea</i>                           | thin, membranaceous                                                                                                                                                                                     | ± curved, entangled, sometimes parallel, not attenuated towards the ends                                                                                        | clearly constricted | very thin, mucilaginous, diffluent, occasionally present | cylindrical, with rounded ends or slightly barrel-shaped to isodiametric<br>W: 0.8–1.2<br>L: 2x longer than wide                              | mostly with one polar granule on either side at cross walls                                                                                 | rounded                                                                                                                    | N/A                                                        | subaerophytic, cave environments                                                        |
| <i>P. skujae</i>                            | –                                                                                                                                                                                                       | solitary, ± straight or slightly flexuous                                                                                                                       | deeply constricted  | –                                                        | faint bluish-cylindrical, with two granules at both sides<br>W: 2.3–2.5<br>L: up to 7.5                                                       | homogeneous, not visibly differentiated into centro- and chromato- plasma with two large ‘voluntine bodies’ at each side at the cross walls | elongated, conically-pointed with one ‘voluntine body’                                                                     | slow gliding motion                                        | subaerophytic, cave environments                                                        |

Table S7-Cont

| Species name                                      | Macroscopic appearance                                                                                                                                                                      | Trichome morphology                                                                                                                                                              | Constrictions                                | Sheaths or envelopes                                                | Vegetative cell color, shape & size (µm)                                                                               | Cell content                                                                                                                      | Apical cell                                                                             | Motility                             | Ecology                                                                          |
|---------------------------------------------------|---------------------------------------------------------------------------------------------------------------------------------------------------------------------------------------------|----------------------------------------------------------------------------------------------------------------------------------------------------------------------------------|----------------------------------------------|---------------------------------------------------------------------|------------------------------------------------------------------------------------------------------------------------|-----------------------------------------------------------------------------------------------------------------------------------|-----------------------------------------------------------------------------------------|--------------------------------------|----------------------------------------------------------------------------------|
| <i>P. limnetica</i>                               | –                                                                                                                                                                                           | solitary, straight or slightly curved, not attenuated towards the ends                                                                                                           | strongly constricted or almost unconstricted | occasionally with thin indistinct mucilaginous envelopes or sheaths | pale blue-green or olive-green,<br>long cylindrical, truncated at both ends<br>W: 1.2–1.5<br>L: 2–8x longer than wide  | homogenous with ± distinctive chromatoplasma without aerotopes                                                                    | rounded                                                                                 | yes                                  | freshwater habitats                                                              |
| <i>P. minima</i>                                  | –                                                                                                                                                                                           | solitary or crowded in clusters, ± straight, not attenuated towards the ends                                                                                                     | intensely constricted                        | N/A                                                                 | pale blue-green<br>W: 1.3–2.5<br>L: 1.5–4.0                                                                            | homogenous without aerotopes                                                                                                      | widely rounded                                                                          | N/A                                  | moist soil, mud, benthic and epipelic in ponds, springs, swamps and salty fields |
| <i>P. galeata</i>                                 | fine, thin indefinite, expanded, and prostrated colonies, forming hemispherical, bubble-like formations or erected flaky clusters usually bright blue-green or emerald-green to olive-green | solitary or in clusters, short, straight or variously curved and entangled, sometimes arranged in parallel, less frequently screw- or ring-like, not attenuated towards the ends | deeply constricted                           | –                                                                   | pale to bright blue-green to grey-blue, cylindrical, with rounded ends<br>W: 0.8–2.4 (2.7)<br>L: 2–4x longer than wide | scarce but prominent granules, clearly or indistinctly differentiated in centro- and chromato- plasma<br>1–2 small polar granules | flat-rounded, rarely slightly conical-rounded with ring- or cupola-like large aerotopes | forwards without waving and rotation | freshwater; benthic, epiphytic, endogloeic, rarely in plankton                   |
| <i>P. foetida</i> var. <i>foetida</i> PTG         | –                                                                                                                                                                                           | solitary, straight or slightly curved, not attenuated towards the ends                                                                                                           | conspicuous                                  | –                                                                   | bright blue-green, long cylindrical with rounded ends<br>W: 1.0–1.7 (2.2)<br>L: 3.4–11.0                               | differentiated in centro- and chromato- plasma, with polar aerotopes                                                              | without calyptra                                                                        | infrequent                           | freshwater; planktic                                                             |
| <i>P. foetida</i> var. <i>subfoetida</i> PS1306   | –                                                                                                                                                                                           | solitary, straight or slightly curved, not attenuated towards the ends                                                                                                           | conspicuous                                  | –                                                                   | bright blue-green, isodiametric to longer than wide with rounded ends<br>W: 2.1–2.9<br>L: 2.5–8.5                      | finely granulated clearly differentiated in centro- and chromato- plasma, with polar aerotopes                                    | without calyptra                                                                        | infrequent                           | freshwater; planktic                                                             |
| <i>P. foetida</i> var. <i>intermedia</i> NIES-512 | –                                                                                                                                                                                           | solitary, straight, not attenuated towards the ends                                                                                                                              | conspicuous                                  | –                                                                   | bright blue-green, cylindrical with rounded ends<br>W: 1.6–2.2<br>L: 3.0–8.3                                           | differentiated in centro- and chromato- plasma, with aerotopes                                                                    | without calyptra                                                                        | infrequent                           | freshwater; planktic                                                             |
| <i>P. cinerea</i>                                 | –                                                                                                                                                                                           | solitary, almost straight, not attenuated towards the ends                                                                                                                       | conspicuous                                  | –                                                                   | brownish green or greenish grey to grey, cylindrical<br>W: 1.4–2.5<br>L: 2.3–9.9                                       | granulated, differentiated in centro- and chromato- plasma                                                                        | without calyptra                                                                        | –                                    | freshwater; planktic                                                             |

Table S7-Cont

| Species name                 | Macroscopic appearance      | Trichome morphology                                                                                           | Constrictions          | Sheaths or envelopes                                                   | Vegetative cell color, shape & size (µm)                                                                                              | Cell content                                                                | Apical cell                                                                                                     | Motility                            | Ecology                             |
|------------------------------|-----------------------------|---------------------------------------------------------------------------------------------------------------|------------------------|------------------------------------------------------------------------|---------------------------------------------------------------------------------------------------------------------------------------|-----------------------------------------------------------------------------|-----------------------------------------------------------------------------------------------------------------|-------------------------------------|-------------------------------------|
| <i>P. yagii</i>              | thin membranaceous colonies | solitary or in clusters, straight or curved, not attenuated towards the ends                                  | conspicuous            | yes                                                                    | bright blue-green, cylindrical with rounded ends<br>W: 1.5–2.3<br>L: 1.9–6.8                                                          | differentiated in centro- and chromato- plasma, with aerotopes              | without calyptra                                                                                                | trembling (only in short trichomes) | freshwater; planktic                |
| <i>P. rutilus-viridis</i>    | –                           | solitary, short or long, sometimes arranged in small flake-like colonies, not attenuated towards the ends     | yes                    | –                                                                      | reddish violet or blue-green, cylindrical, barrel-shaped to oval with rounded end<br>W: (1.4) 1.6–2.5 (3.2)<br>L: 2.0–4.4 (8.0)       | with small granule (aerotope?)                                              | N/A                                                                                                             | trembling and creeping              | freshwater; planktic                |
| <i>P. biceps</i>             | –                           | solitary or in small groups, straight or slightly curved, not attenuated towards the ends                     | intensely constricted  | –                                                                      | pale to bright blue-green, cylindrical to barrel-shaped, rounded at the ends<br>W: 2.7–3.0<br>L: 3.0–7.5                              | distinctly differentiated in centro- and chromato- plasma with few granules | ± narrowed, rounded-pointed at the ends bearing one large subterminal annular aerotope or a few small aerotopes | N/A                                 | freshwater, benthic or epipellic    |
| <i>P. apiculato-flexuosa</i> | –                           | solitary or in clusters, long, usually coiled, not attenuated towards the ends,                               | slightly constricted   | facultative; very fine, thin, colourless (mainly in cultures)          | blue-green, cylindrical<br>W: 1.0–2.5<br>L: 4.8–6.2                                                                                   | not clearly differentiated into centro- and chromato- plasma                | conical, rounded-pointed                                                                                        | slightly motile                     | alkaline marshes                    |
| <i>P. belizensis</i>         | –                           | solitary or joined in irregular clusters, long, usually coiled, not attenuated towards the ends               | distinctly constricted | facultative; thin, diffuse, colourless (only in cultures)              | pale blue-green, cylindrical<br>W: 1.0–2.0 (2.4)<br>L: 6.0–15.0                                                                       | ± homogenous                                                                | cylindrical and rounded                                                                                         | slightly motile                     | alkaline marshes                    |
| <i>P. mucicola</i>           | –                           | solitary or few together, short (up to 12-celled), straight or slightly bent, not attenuated towards the ends | ±clearly constricted   | fine, diffluent, colourless mucilaginous envelope, rarely fine sheaths | pale bluish to blue-green<br>short, cylindrical with rounded ends to slightly barrel-shaped<br>W: 1.3–2.0<br>L: 1–2x longer than wide | homogenous or finely granulated                                             | cylindrical with conical-rounded or rounded end, without calyptra                                               | –                                   | freshwater, endogloeic, epiplanktic |

Table S7-Cont

| Species name         | Macroscopic appearance                                                                                                                                                                  | Trichome morphology                                                                                                                                                                                 | Constrictions               | Sheaths or envelopes                 | Vegetative cell color, shape & size (µm)                                                                                                                                  | Cell content                                                                  | Apical cell                                                                     | Motility                                  | Ecology                                |
|----------------------|-----------------------------------------------------------------------------------------------------------------------------------------------------------------------------------------|-----------------------------------------------------------------------------------------------------------------------------------------------------------------------------------------------------|-----------------------------|--------------------------------------|---------------------------------------------------------------------------------------------------------------------------------------------------------------------------|-------------------------------------------------------------------------------|---------------------------------------------------------------------------------|-------------------------------------------|----------------------------------------|
| <i>P. persicina</i>  | red to pinkish in colour, very thin, finely membranaceous                                                                                                                               | intensely coiled and tangled, few- or multi- celled                                                                                                                                                 | clearly constricted         | thin, amorphous, diffluent, mucilage | pale reddish, cylindrical<br>W: 1.7–2.0<br>L: 2.0–7.0                                                                                                                     | ± homogenous without aerotopes                                                | acute conical without calyptra                                                  | trembling or slowly gliding               | marine, epizoic or epiphytic           |
| <i>P. curta</i>      | –                                                                                                                                                                                       | irregularly aggregated in gelatinous mats, short (max; 12 µm long), straight or slightly arcuated to S-like curved, not attenuated towards the ends, irregularly arranged in mucilage               | not or slightly constricted | thin, indistinct, diffluent          | pale blue-green, long cylindrical, W: 0.5–0.8<br>L: 2–3x longer than wide                                                                                                 | granulated                                                                    | rounded or slightly conical-rounded                                             | N/A                                       | edaphic; surface layers of sandy soils |
| <i>P. thermalis</i>  | thin, indefinite, expanded and prostrate colonies, forming spherical to subspherical, bubble-like or erect, flaky clusters, bright blue-green, or emerald-green to olive green          | straight or variously curved and entangled, sometimes arranged in parallel, frequently screw- or ring-like coiled, short (up to 150-celled) or long, not attenuated towards the ends                | not or slightly constricted | –                                    | bright blue-green to grey-blue, joined with each other with a thick hyaline bridge<br>W: 0.8–2.4 (2.7)<br>L: 2–4x longer than wide                                        | sometimes with scarcely prominent granules                                    | flat-rounded, rarely slightly conical with ring- or cupola-like large aerotopes | N/A                                       | thermal waters                         |
| <i>P. lonchoides</i> | thallus fine, thin indefinite, expanded, forming mats attached to the substrate or free-floating, usually bright blue-green, rarely bluish to greenish or yellow-green to emerald-green | straight or variously curved, sometimes slightly screw-like or spirally-coiled, usually densely arranged and entangled or parallel-arranged, usually 50–100-celled, not attenuated towards the ends | ± clearly constricted       | –                                    | bright blue-green or emerald-green to grey-blue or greyish, cylindrical with rounded ends, joined with each other with a thick hyaline bridge<br>W: 0.6–1.3<br>L: 2.0–8.0 | homogeneous, without granules, differentiated in centro- and chromato- plasma | acute conical with a single ± lance-like lengthened aerotope, without calyptra  | forwards without oscillation and rotation | thermal springs                        |
| <i>P. oblonga</i>    | –                                                                                                                                                                                       | short                                                                                                                                                                                               | deeply constricted          | N/A                                  | spherical to subcylindrical<br>W: 4.6<br>L: up to 7.0                                                                                                                     | N/A                                                                           | conical                                                                         | N/A                                       | thermal springss                       |

Table S7-Cont

| Species name               | Macroscopic appearance | Trichome morphology                                                                                                                                      | Constrictions                      | Sheaths or envelopes                   | Vegetative cell color, shape & size (µm)                                                                                                    | Cell content                                                | Apical cell                                                    | Motility                                       | Ecology                                                                    |
|----------------------------|------------------------|----------------------------------------------------------------------------------------------------------------------------------------------------------|------------------------------------|----------------------------------------|---------------------------------------------------------------------------------------------------------------------------------------------|-------------------------------------------------------------|----------------------------------------------------------------|------------------------------------------------|----------------------------------------------------------------------------|
| <i>P. articulata</i>       | –                      | solitary or crowded in microscopic aggregates, moderately long (4–40-celled), ± straight or slightly irregularly curved, not attenuated towards the ends | exceedingly constricted            | usually without mucilaginous envelopes | pale greyish to greyish blue-green, cylindrical truncate-rounded ends<br>W: 0.8–1.3<br>L: 3.5–11                                            | scattered coarse granules without aerotopes                 | rounded or conical rounded                                     | rapid gliding without oscillation and rotation | facultatively benthic, later tychoplanktic and planktic                    |
| <i>P. acicularis</i>       | –                      | solitary, usually short, straight, arcuated or slightly irregularly curved                                                                               | –                                  | N/A                                    | pale blue-green<br>W: 1.0–1.5<br>L: 8.0–12.0                                                                                                | more or less homogenous                                     | straight, elongated and pointed                                | N/A                                            | free-floating in lakes                                                     |
| <i>P. amphigranulata</i>   | –                      | straight, short (up to 30-celled), not attenuated towards the ends                                                                                       | slightly or distinctly constricted | –                                      | pale blue-green, with two aerotopes at both sides of the septa<br>W: 1.0–1.4–2.2<br>L: 2.0–7.0                                              | ± distinctly differentiated in centro- and chromato- plasma | rounded without calyptra                                       | slowly motile                                  | various freshwater and brackish habitats; benthic, metaphytic, periphytic  |
| <i>P. balatonica</i>       | –<br>–                 | straight, short                                                                                                                                          | distinctly constricted             | fine, indistinct sheath                | short cylindrical, isodiametric to up to 2x longer than wide                                                                                | N/A                                                         | N/A                                                            | N/A                                            | –                                                                          |
| <i>P. tenuis</i>           | –                      | solitary or in clusters, straight or slightly coiled, not attenuated towards the ends                                                                    | distinctly constricted             | –                                      | pale blue-green, long cylindrical to long ellipsoidal with rounded ends, somewhat zigzag joined with each other<br>W: 1.0–1.5<br>L: 6.0–8.0 | without aerotopes                                           | rounded                                                        | N/A                                            | freshwater, benthic, on putrified mud, in humus benthos, littoral of lakes |
| <i>P. raphidioides</i>     | –                      | usually 4–8 celled, attenuated towards the ends, ± screw-like; may disintegrate into solitary cells                                                      | N/A                                | N/A                                    | pale grey-green, cylindrical,<br>W: 0.7–0.9<br>L: longer than wide                                                                          | solitary granules at cross-walls                            | gradually pointed                                              | N/A                                            | freshwater, planktic                                                       |
| <i>P. papillaterminata</i> | –                      | solitary, usually short, straight, arcuated or slightly waved                                                                                            | distinctly constricted             | –                                      | pale blue-green,<br>W: 2.5–3.3<br>L: 3.5–7.0                                                                                                | 1–3 refractive granules                                     | small conical protrusion, probably with a ring-shaped aerotope | N/A                                            | freshwater and salty habitats; benthic                                     |

Table S7-Cont

| Species name           | Macroscopic appearance                                                  | Trichome morphology                                                                                                                                  | Constrictions               | Sheaths or envelopes                                          | Vegetative cell color, shape & size (µm)                                                                                           | Cell content                       | Apical cell                                                           | Motility | Ecology                |
|------------------------|-------------------------------------------------------------------------|------------------------------------------------------------------------------------------------------------------------------------------------------|-----------------------------|---------------------------------------------------------------|------------------------------------------------------------------------------------------------------------------------------------|------------------------------------|-----------------------------------------------------------------------|----------|------------------------|
| <i>P. dictyothalla</i> | blue-green, free-floating mucilaginous to irregularly clathrate thallus | straight when young, later long, arranged parallel or subparallel or irregularly flexuous, not attenuated towards the ends                           | constricted                 | instinct, initially gelatinous, later amorphous and confluent | blue-green, cylindrical with truncate-rounded ends<br>W: 1.0–1.5–2.0<br>L: 1.0–7.0                                                 | homogenous without aerotopes       | acute or rounded conical without calyptra                             | N/A      | freshwater, planktic   |
| <i>P. woronichinii</i> | –                                                                       | solitary, short (max. 8-celled), straight or slightly curved, not or slightly attenuated towards the ends; arranged within mucilage of host organism | not or slightly constricted | –                                                             | pale blue-green or greyish, long cylindrical,<br>W: 1.0–2.0<br>L: 2.5–8.0                                                          | sometimes with refractive granules | rounded or slightly conical-rounded                                   | –        | freshwater, endogloeic |
| <i>P. endophytica</i>  | –                                                                       | solitary or in groups, very short, straight or slightly irregularly curved, ± radially-oriented                                                      | –                           | thin, colourless                                              | pale blue-green, isodiametric to longer than wide,<br>W: 1.5–2.3<br>L: 2.3–6.9                                                     | homogenous                         | rounded                                                               | –        | freshwater, endogloeic |
| <i>P. westiana</i>     | –                                                                       | short (max; 8-celled), ± radially-oriented or dispersed within mucilage of other spp.                                                                | slightly constricted        | thick mucilaginous envelope                                   | intense to pale blue-green, short cylindrical to rod-like or cylindrical-ellipsoidal with rounded ends<br>W: 0.6–1.5<br>L: 1.0–3.0 | homogenous or with tiny granules   | N/A                                                                   | –        | freshwater, endogloeic |
| <i>P. rosea</i>        | –                                                                       | solitary, short (up to 6-celled), straight or slightly bent, not attenuated towards the ends                                                         | constricted                 | –                                                             | reddish-violet, cylindrical<br>W: 1.0–2.5<br>L: ± isodiametric or slightly longer than wide                                        | homogenous without aerotopes       | cylindrical with flat conical apex without calyptra                   | –        | freshwater, endogloeic |
| <i>P. arcuata</i>      | –                                                                       | solitary, short (max. 15-celled), ± straight or curved (arcuated), not attenuated towards the ends                                                   | clearly constricted         | amorphous, diffluent                                          | pale blue-green to pale olive-green, cylindrical,<br>W: 0.9–1.3<br>L: 2.0–14.0                                                     | homogenous or finely granulated    | acute, cylindrical and conical or slightly truncated without calyptra | –        | freshwater, endogloeic |

Table S7-Cont

[illegible]

Table S7-Cont

| Species name       | Macroscopic appearance | Trichome morphology | Constrictions | Sheaths or envelopes | Vegetative cell color, shape & size (µm) | Cell content | Apical cell | Motility | Ecology |
|--------------------|------------------------|---------------------|---------------|----------------------|------------------------------------------|--------------|-------------|----------|---------|
| <i>P. edaphica</i> | N/A                    | N/A                 | N/A           | N/A                  | N/A                                      | N/A          | N/A         | N/A      | N/A     |

## References:

1. Komárek, J.; Anagnostidis, K. Cyanoprokaryota 2. Teil/ 2nd Part: Oscillatoriales. In *Süßwasserflora von Mitteleuropa 19/2*; Büdel, B., Krienitz, L., Gärtner, G., Schagerl, M., Eds.; Elsevier/Spektrum: Heidelberg, 2005; p. 759.
2. Skuja, H. Some Algae and Protists. In *Vegetation of Amchitka Island, Aleutian Islands, Alaska*; Shacklette, H.T., Durrell, L.W., Erdman, J.A., Keith, J.R., Klein, W.M., Krog, H., Persson, H., Skuja, H., Weber, W.A., Eds.; United States Government Printing Office: Washington, USA, 1969, pp 50–55.
3. Niiyama, Y.; Tuji, A.; Takemoto, K.; Ichise, S. *Pseudanabaena foetida* sp. nov. and *P. subfoetida* sp. nov. (cyanophyta/ cyanobacteria) producing 2-methylisoborneol from Japan. *Fottea* **2016**, *16*, 1–11, doi:10.5507/fot.2016.006.
4. Tuji, A.; Niiyama, Y. The Identity and phylogeny of *Pseudanabaena* strain, NIES-512, producing 2-methylisoborneol (2-MIB). *Bull. Natl. Museum Nat. Sci. Ser. B* **2016**, *42*, 83–89.
5. Kling, H.J.; Dail Laughinghouse, I.; Šmarda, J.; Komárek, J.; Acreman, J.; Bruun, K.; Watson, S.B.; Chen, F. A new red colonial *Pseudanabaena* (Cyanoprokaryota, Oscillatoriales) from North American large lakes. *Fottea* **2012**, *12*, 327–339, doi:10.5507/fot.2012.023.
6. Turicchia, S.; Ventura, S.; Komárková, J.; Komárek, J. Taxonomic evaluation of cyanobacterial microflora from alkaline marshes of northern Belize. 2. Diversity of oscillatorialelean genera. *Nov. Hedwigia* **2009**, *89*, 165–200, doi:10.1127/0029-5035/2009/0089-0165.
7. Guiry, M.D.; Guiry, G.M. AlgaeBase. World-Wide Electronic Publication, National University of Ireland, Galway, Ireland 2022.
