# Supplementary material
Source: MDPI journal article supplement (https://www.mdpi.com/1424-2818/15/8/909)
Supplement: s1 [file s1 › TablesS1-S6.xlsx]

## Sheet: Table S1
Table S1. Cyanobacteria-specific primers used for PCR amplification and/or Sanger sequencing of 16S rRNA gene and 16S–23S ITS region.
Primer name	Sequence (5’à3’)	Target site	Purpose	References
16S106F	CGGACGGGTGAGTAACGCGTGA	16S	PCR amplification & Sanger sequencing	[1]
23S30R	CTTCGCCTCTGTGTGCCTAGGT	23S		[2]
16S359F	GGGGAATYTTCCGCAATGGG	16S	Sanger sequencing	[1]
16S979F	CGATGCAACGCGAAGAAC	16S		[3]
16S781R	GACTACWGGGGTATCTAATCCCWTT	16S		[1]
16S1092R	GCGCTCGTTGCGGGACTT	16S		[3]
P5	TGTACACACCGGCCCGTC	16S		[4,5]
P6	GACGGGCCGGTGTGTACA	16S		[4,5]
P17	ATTAGCTCAGGTGGTTAG	tRNAIle		[5]
ILE373R	CTAACCACCTGAGCTAAT	tRNAIle		[6]
References
1	Nübel, U.; Garcia-Pichel, F.; Muyzer, G. PCR primers to amplify 16S rRNA genes from Cyanobacteria. Appl. Environ. Microbiol. 1997, 63, 3327–3332.
2	Taton, A.; Grubisic, S.; Brambilla, E.; De Wit, R.; Wilmotte, A. Cyanobacterial diversity in natural and artificial microbial mats of Lake Fryxell (McMurdo Dry Valleys, Antarctica): A morphological and molecular approach. Appl. Environ. Microbiol. 2003, 69, 5157–5169
3	Hrouzek, P.; Ventura, S.; Lukešová, A.; Mugnai, M.-A.; Turicchia, S.; Komárek, J. Diversity of soil Nostoc strains: Phylogenetic and phenotypic variability. Arch. Hydrobiol. Suppl. Algol. Stud. 2005, 117, 251–264
4	Boyer, S.L.; Johansen, J.R.; Flechtner, V.R.; Howard, G.L.; Bliss, F. Phylogeny and genetic variance in terrestrial Microcoleus (cyanophyceae) species based on sequence analysis of the 16s rRNA gene and associated 16S–23S ITS region. J. Phycol 2002, 38, 1222–1235
5	Wilmotte, A.; Van der Auwera, G.; De Wachter, R. Structure of the 16S ribosomal RNA of the thermophilic cyanobacterium Chlorogloeopsis HTF ('Mastigocladus laminosus HTF’) strain PCC7518, and phylogenetic analysis. FEBS Lett. 1993, 317, 96–100
6	Iteman, I.; Rippka, R.; De Marsac, N.T.; Herdman, M. Comparison of conserved structural and regulatory domains within divergent 16S rRNA-23S rRNA spacer sequences of cyanobacteria. Microbiology 2000, 146, 1275–1286, doi:10.1099/00221287-146-6-1275.

## Sheet: Table S2
Table S2. The 243 taxa included in the 16S rRNA phylogenetic analyses and their GenBank accession numbers
	GenBank acc. number	Taxon name
1	OP594631	Pseudanabaena epilithica sp. nov	UHCC 1008
2	OP594632	Pseudanabaena suomiensis sp. nov	UHCC 1009
3	LC434120	Pseudanabaena limnetica	Ak1199
4	LC016774	Pseudanabaena sp.	Ak1201
5	LC016775	Pseudanabaena sp.	PS1303
6	LC434121	Pseudanabaena limnetica	Lim1
7	LC571766	Pseudanabaena limnetica	LIM1
8	OM732231	Pseudanabaena sp.	BACA0266
9	KM020004	Pseudanabaena catenata	SAG 254.80
10	LC571768	Pseudanabaena catenata	SAG 254.80
11	GU935358	Pseudanabaena sp.	Sai012
12	MG767202	Pseudanabaena catenata	NIVA-CYA146
13	KM020005	Pseudanabaena catenata	SAG 1464
14	AB039020	Pseudanabaena catenata	PCC 7408
15	ALWB01000102	Pseudanabaena biceps	PCC 7429
16	LC016773	Pseudanabaena foetida var. foetida	PTG
17	LC016779	Pseudanabaena foetida var. subfoetida	PS1306
18	LC153790	Pseudanabaena foetida var. intermedia	NIES 512
19	LC016776	Pseudanabaena limnetica	NIVA/CYA276-6
20	LC314124	Pseudanabaena yagii	NIVA-CYA111
21	LC314143	Pseudanabaena yagii	NIES-4237
22	LC506589	Pseudanabaena yagii	NIES-4238
23	LC506590	Pseudanabaena cinerea	NIES-4065
24	LC314122	Pseudanabaena cinerea	NIES-4063
25	LC314116	Pseudanabaena cinerea	Ak1548
26	LC314120	Pseudanabaena cinerea	Ak1349
27	KM386853	Pseudanabaena galeata	CHAB2916
28	MN128993	Pseudanabaena galeata	NRERC-312
29	LC085885	Pseudanabaena galeata	PB
30	KM386854	Pseudanabaena galeata	CHAB732
31	KM386851	Pseudanabaena mucicola	CHAB7002
32	KM386852	Pseudanabaena mucicola	CHAB2966
33	KM386848	Pseudanabaena mucicola	CHAB717
34	KR912197	Pseudanabaena mucicola	PM201405
35	KM386849	Pseudanabaena mucicola	CHAB721
36	MN128994	Pseudanabaena mucicola	NRERC-306
37	KM020003	Pseudanabaena galeata	SAG 13.83
38	MN273769	Pseudanabaena galeata	CCNP1313
39	KM386847	Pseudanabaena minima	CHAB705
40	HQ132935	Pseudanabaena minima	GSE-PSE20-05C
41	MH522449	Pseudanabaenaceae cyanobacterium	GSE-PSE-MK15-19B
42	MH522450	Pseudanabaenaceae cyanobacterium	GSE-PSE-MK21-19D
43	AF132787	Pseudanabaena sp.	PCC 7402
44	KY379872	Pseudanabaena sp.	CZS 35E
45	JF429939	Pseudanabaena sp.	dqh15
46	AF132778	Pseudanabaena sp.	PCC 6903
47	KM386857	Pseudanabaena limnetica	CHAB774
48	KM386856	Pseudanabaena limnetica	CHAB792
49	KM386855	Pseudanabaena limnetica	CHAB786
50	LC085884	Pseudanabaena limnetica	PG
51	MN833625	Thalassoporum komareki	TAU-MAC 1515
52	AF091108	Pseudanabaena sp.	PCC 7367
53	KU951798	Pseudanabaena cf. curta	LEGE 10371
54	AB039019	Pseudanabaena sp.	PCC 7403
55	AB039016	Pseudanabaena sp.	PCC 6802
56	MK861856	Albertania alaskaensis	KL12
57	MK861859	Albertania alaskaensis	L11
58	MK861857	Albertania alaskaensis	KV23
59	MH030274	Albertania skiophila	SA373 Zammit 2014
60	KF246497	Alkalinema pantanalense	CENA531
61	KF246494	Alkalinema pantanalense	CENA528
62	KF246495	Alkalinema pantanalense	CENA529
63	KT315945	Anagnostidinema carotinosum	JR21
64	KT315940	Anagnostidinema pseudacutissimum	CCALA 150
65	NR_177762	Anagnostidinema pseudacutissimum
66	KT315937	Anagnostidinema pseudacutissimum	ladakh26
67	NR_177763	Annamia dubia
68	NR_177026	Annamia dubia	NIES-4383
69	HQ658457	Annamia toxica	HOs24
70	DQ393280	Arthrospira platensis	UTEX 2340
71	NR_125583	Brasilonema angustatum	HA4187-MV1
72	NR_125582	Brasilonema angustatum	HA4187-MV1
73	NR_115807	Brasilonema bromeliae	SPC951
74	NR_115956	Brasilonema octagenarum	UFV-E1
75	NR_116034	Brasilonema terrestre	CENA116
76	KR676347	Calenema singularis	LEGE 06188
77	EF654083	Cephalothrix komarekiana	SAG 75.79
78	AF132777	Chlorogloeopsis fritschii	PCC 6718
79	EF654043	Coleofasciculus chthonoplastes	SAH
80	EF654053	Coleofasciculus chthonoplastes	WW5
81	AB115965	Crinalium magnum	SAG 34.87
82	KY078770	Drouetiella fasciculata	GSE-PSE-MK29-07A
83	ON897677	Drouetiella hepatica	KPABG-C-013-09
84	ON897678	Drouetiella hepatica	KPABG-4161
85	NR_177806	Elainella saxicola
86	MG831207	Elainella saxicola	E11
87	MG831206	Elainella saxicola	E8
88	AB093487	Fischerella major	NIES-592
89	FM210758	Geitlerinema sp.	PCC 8501
90	AB039001	Geminocystis herdmanii	PCC 6308
91	KF246492	Geminocystissp.	CENA526
92	AB093484	Hapalosiphon delicatulus	IAM-M-266
93	EU151900	Hapalosiphon hibernicus	BZ-3-1
94	AY034793	Hapalosiphon welwitschii
95	KJ767019	Hapalosiphon welwitschii	UH-IC-52-3
96	EU249124	Hydrocoleum lyngbyaceum	HBC7
97	HM748317	Iphinoe spelaeobios	LO2-B1
98	NR_117880	Iphinoe spelaeobios
99	MF351541	Jaaginema geminatum	SM-S13
100	NR_177848	Jaaginema litorale
101	KJ140088	Johansenia constricta	K2_6P1
102	KJ140087	Johansenia constricta	K2_5P3
103	KP221932	Kamptonema animale	CCALA 771
104	EF654087	Kamptonema animale	SAG 1459-6
105	KP221931	Kamptonema animale	CCALA 139
106	KJ140092	Komvophoron hindakii	K9_3P8
107	KJ140091	Komvophoron hindakii	K9_3P6
108	KU161670	Kovacikia muscicola	HA7619-LM3 clone-41B
109	KU161669	Kovacikia muscicola	HA7619-LM3 clone-41A
110	AF218372	Leptolyngbya angustata	UTCC473
111	EF429292	Leptolyngbya boryana	UTEX B487
112	EF429290	Leptolyngbya boryana	PCC 6306
113	LC215287	Leptolyngbya boryana	NIES-2135
114	HQ832915	Leptolyngbyacf. halophila	LEGE 06152
115	EF429300	Leptolyngbya corticola	CCALA 085
116	X84808	Leptolyngbya foveolarum
117	KT592515	Leptolyngbyasp.	RBD05
118	KF417652	Leptolyngbyasp.	SAG 2411
119	EF088337	Leptolyngbyasp.	CENA112
120	EU528672	Leptolyngbyasp.	Kovacik1990/54
121	AF218368	Leptolyngbya tenerrima	UTCC77
122	GQ859652	Leptolyngbya tenuis	PMC304.07
123	KY744812	Leptothoe kymatousa	TAU-MAC 1215
124	MH982247	Leptothoe kymatousa	TAU-MAC 1615
125	KY744809	Leptothoe sithoniana	TAU-MAC 0915
126	KY744810	Leptothoe spongobia	TAU-MAC 1015
127	KP726241	Limnothrix planktonica	KLL-C001
128	JQ0040222	Limnothrix planktonica	CHAB751
129	KP726240	Limnothrix planktonica	KLL-C001 clone b
130	KP726241	Limnothrix planktonica	KLL-C001 clone a
131	MN062659	Limnothrix redekei	TAU-MAC 0310
132	AJ505942	Limnothrix redekei	165a
133	FM177493	Limnothrix redekei	2LT25S01
134	KM438191	Limnothrix sp.	PsrGTmp11
135	KR676348	Lusitaniella coriacea	LEGE 07157
136	KR676349	Lusitaniella coriacea	LEGE 07167
137	DQ431003	Mastigocladus laminosus	Greenland-8
138	EF654070	Microcoleus sp.	HTT-U-KK5
139	EF654075	Microcoleus sp.	SAG 2212
140	EF654064	Microcoleus vaginatus	CNP3-KK2
141	KJ939052	Myxacorys californica	WJT36-NPBG1
142	MF996895	Myxacorys californica	WJT24-NPBG12B
143	KJ939079	Myxacorys chilensis	ATA2-1-KO14
144	EU528669	Nodosilinea bijugata	KOVACIK1986/5a
145	NR_176997	Nodosilinea epilithica	Kovacik 1998/7
146	KF307598	Nodosilinea nodulosa	UTEX-2910
147	MK861901	Nodosilinea nodulosa	V6
148	NR_172674	Oculatella atacamensis	ATA3-4Q-CV5
149	NR_172675	Oculatella cataractarum	GSE-PSE-MK52-07L
150	NR_172676	Oculatella coburnii	WJT66-NPBG6A
151	KF417431	Oculatella kauaiensis	HA4348-LM1
152	NR_177041	Oculatella kazantipica	SAG 2567
153	MN061918	Oculatella lusitanica	LEGE 161147
154	KF761572	Oculatella mojaviensis	CMT-3BRIN-NPC87
155	KP739262	Oculatella subterranea	Dav2010-SS2-1A
156	NR_172692	Pegethrix bostrychoides	GSE-PSE-MK47-15B
157	NR_172690	Pegethrix convoluta	GSE-PSE-MK38-07D
158	KY078767	Pegethrix indistincta	GSE-TBC-07GB
159	NR_172691	Pegethrix indistincta	GSE-TBC-7GA
160	NR_172661	Pegethrix olivacea	GSE-PSE-MK46-15A
161	MF348313	Persinema komarekii	TM-S1 clone cl2
162	MF348314	Persinema komarekii	TM-S1 clone cl3
163	AY493581	Phormidesmis priestleyi	ANT.L66.1
164	AY493578	Phormidesmis priestleyi	ANT.L52.4
165	AY493579	Phormidesmis priestleyi	ANT.L52.6
166	EF654084	Phormidium autumnale	SAG 78.79
167	EF654081	Phormidium autumnale	SAG 35.90
168	DQ493872	Phormidium murrayi	Ant-Ph58
169	AB510147	Phormidium sp.	KS
170	HQ832899	Phormidium sp.	LEGE 07162
171	MT229714	Pinocchia daecheonga	FBCC-A230
172	MT229717	Pinocchia daecheonga	AK-NO235
173	MT229718	Pinocchia daecheonga	AK-NO236
174	KP640606	Pinocchia polymorpha	E5-4
175	KP640604	Pinocchia polymorpha	E5-1
176	KP640605	Pinocchia polymorpha	E5-2
177	KP640609	Pinocchia polymorpha	E10-1
178	KP640612	Pinocchia polymorpha	E10-4
179	KP640611	Pinocchia polymorpha	clone-E10.3
180	KP640613	Pinocchia polymorpha	clone-E10.5
181	KF487299	Planktolyngbya limnetica	S14
182	GQ859645	Planktolyngbya limnetica	PMC271.6
183	FJ159128	Planktothrix agardhii	HAB-637
184	GQ351563	Planktothrix agardhii	NIVA-CYA-68
185	KJ939021	Plectolyngbya sp.	HA4277-MV3
186	KJ939022	Plectolyngbya sp.	WJT66-NPBG17
187	KM019980	Prochlorothrix hollandica	PCC 9006
188	AJ007907	Prochlorothrix hollandica
189	DQ393595	Pseudanabaena constantiae
190	HQ658458	Pseudanabaena galeata	SP44
191	OL339349	Pseudanabaena galeata	UTEX-B-SP44
192	KM438180	Pseudanabaena lonchoides	PltPSln33
193	KM438196	Pseudanabaena lonchoides	NgrPSln22
194	KT315915	Pseudanabaena sp.	SCSIO-S3
195	KC463184	Pseudanabaena sp.	Es-Yyy1300
196	MN145866	Pseudanabaena westiana	NRERC-303
197	EF654068	Pseudanabaenaceae cyanobacterium	HTJ2-KK1
198	KC525097	Pseudanabaenaceae cyanobacterium	HA4216-MV1
199	EU445293	Schizothrix sp.	PNG5-22
200	KP688590	Scytolyngbya timoleontis	XSP3
201	KP688588	Scytolyngbya timoleontis	XSP1
202	KP688589	Scytolyngbya timoleontis	XSP2
203	AM709637	Scytonema hofmanni	PCC 7110
204	KT222810	Scytonema sp.	CG23
205	AY493603	Shackletoniella antarctica	ANT.LG2.5
206	AY493606	Shackletoniella antarctica	ANT.L18.2
207	MK861907	Shackletoniella antarctica	KL8
208	AJ639890	Spirulina major	0BB36S18
209	AY575935	Spirulina subsalsa	PD2002
210	AY493576	Stenomitos frigidus	ANT.L53B.2
211	AY493612	Stenomitos frigidus	ANT.L52B.3
212	AY493577	Stenomitos frigidus	ANT.L64B.1
213	NR_172591	Stenomitos hiloensis	HA6792-KK3
214	NR_172564	Stenomitos kolaensis	Pasv-RS28
215	KF417430	Stenomitos rutilans	HA7619-LM2
216	KC525091	Stenomitos sp.	WJT24-NPBG20-clone-P25A
217	KF761557	Stenomitos sp.	WJT24NPBG20-P25A
218	MN152980	Stenomitos sp.	HA6792-KK3
219	AF218371	Stenomitos tremulus
220	GQ402026	Symploca atlantica	CCY9617
221	GQ402025	Symplocasp.	CCY0030
222	EU249122	Symplocasp.	HBC5
223	NR_074309	Synechococcus elongatus	PCC 6301
224	HQ132936	Tapinothrix clintonii	GSE-PSE06-07G
225	NR_176560	Tenebriella amphibia	RMCB14
226	NR_176565	Tenebriella curviceps	RMCB17
227	MK861909	Tildeniella alaskaensis	KL16
228	MK861911	Tildeniella alaskaensis	T16
229	MK861910	Tildeniella alaskaensis	KL28
230	KY498227	Tildeniella torsiva	HUBEL1974-223
231	KY498228	Tildeniella torsiva	UHER-1998-13D
232	KY498229	Tildeniella torsiva	UHER1998-13D
233	LT634149	Timaviella circinata	GR4
234	LT634150	Timaviella karstica	GR13
235	KX375342	Toxifilum mysidocida	MYSIDO1
236	MT488083	Toxifilum sp.	CHAB-TP201504-clone-02
237	MT488082	Toxifilum sp.	CHAB-TP201504-clone-01
238	EF429297	Trichocoleus badius	CRS-1
239	KF307618	Trichocoleus desertorum	ATA1-4-CV13
240	NR_172668	Trichocoleus desertorum	ATA4-8-CV2
241	KF307617	Trichocoleus desertorum	ATA1-4-KO5
242	AF091322	Trichodesmium hildebrandtii
243	JF925320	Wilmottia murrayi	CYN76

## Sheet: Table S3
Table S3. Nucleotide sequences used in the 16S rRNA and 16S–23S ITS combined analyses
	Taxon name		GenBank accession numbers
			16S rRNA	16S–23S ITS
1	Pseudanabaena epilithica sp. nov	UHCC 1008	OP594631	OP595723
2	Pseudanabaena suomiensis sp. nov	UHCC 1009	OP594632	OP595724
3	Pseudanabaena sp.	BACA0266	OM732231
4	Pseudanabaena catenata	SAG 254.80	KM020004	LC571768
5	Pseudanabaena catenata	NIVA-CYA146	MG767202	MG757558
6	Pseudanabaena sp.	Sai012	GU935358
7	Pseudanabaena sp.	PS1303	LC016775
8	Pseudanabaena limnetica	Ak1199	LC434120
9	Pseudanabaena sp.	Ak1201	LC016774
10	Pseudanabaena limnetica	LIM1	LC571766
11	Pseudanabaena limnetica	Lim1	LC434121
12	Pseudanabaena sp.	PCC 6903	AF132778	AM709632
13	Pseudanabaena sp.	CZS-35E	KY379872
14	Pseudanabaena yagii	NIES-4237	LC314143
15	Pseudanabaena yagii	NIES-4238	LC506589	LC314145
16	Pseudanabaena yagii	NIVA-CYA111	LC314124
17	Pseudanabaena foetida var. foetida	PTG	LC016773
18	Pseudanabaena foetida var. subfoetida	PS1306	LC016779
19	Pseudanabaena foetida var. intermedia	NIES 512	LC153790
20	Pseudanabaena limnetica	NIVA-CYA276/6	LC016776
21	Pseudanabaena mucicola	CHAB2966	KM386852
22	Pseudanabaena mucicola	CHAB7002	KM386851
23	Pseudanabaena cinerea	NIES-4065	LC506590	LC314118
24	Pseudanabaena cinerea	NIES-4063	LC314122
25	Pseudanabaena cinerea	Ak1349	LC314120
26	Pseudanabaena galeata	PB	LC085885
27	Pseudanabaena galeata	CHAB2916	KM386853
28	Pseudanabaena galeata	SAG 13.83	KM020003
29	Pseudanabaena galeata	CCNP1313	MN273769
30	Pseudanabaena minima	GSE-PSE20-05C	HQ132935
31	Pseudanabaena minima	CHAB705	KM386847
32	Pseudanabaenaceae cyanobacterium	GSE-PSE-MK15-19B	MH522449
33	Pseudanabaenaceae cyanobacterium	GSE-PSE-MK21-19D	MH522450
34	Pseudanabaena biceps	PCC 7429	ALWB01000102
35	Pseudanabaena limnetica	CHAB774	KM386857
36	Pseudanabaena limnetica	CHAB786	KM386856
37	Pseudanabaena limnetica	CHAB792	KM386855
38	Pseudanabaena limnetica	PG	LC085884
39	Thalassoporum komareki	TAU-MAC 1515	MN833625	MT549670

## Sheet: Table S4
Table S4. Comparison of the 16S rRNA sequence similarity between Pseudanabaena and other closely related strains. Similarity = 100×[1−(p-distance)]
	GenBank acc. numb.	Taxon name		1	2	3	4	5	6	7	8	9	10	11	12	13	14	15	16	17	18	19	20	21	22	23	24	25	26	27	28	29	30	31	32	33	34	35	36	37	38	39	40	41	42	43	44	45	46
1	OP594631	Pseudanabaena epilithica sp. nov	UHCC 1008
2	OP594632	Pseudanabaena suomiensis sp. nov	UHCC 1009	99.2692
3	LC434120	Pseudanabaena limnetica	Ak1199	100	99.2692
4	LC016774	Pseudanabaena sp.	Ak1201	99.7922	99.164	99.7922
5	LC016775	Pseudanabaena sp.	PS1303	99.8962	99.2692	99.8962	99.7922
6	LC434121	Pseudanabaena limnetica	Lim1	99.7922	99.164	99.7922	100	99.7922
7	LC571766	Pseudanabaena limnetica	LIM1	99.7922	99.164	99.7922	100	99.7922	100
8	OM732231	Pseudanabaena sp.	BACA0266	98.103	98.3162	98.103	98.2101	98.103	98.2101	98.2101
9	KM020004	Pseudanabaena catenata	SAG 254.80	99.8962	99.3737	99.8962	99.7922	99.8962	99.7922	99.7922	98.1021
10	LC571768	Pseudanabaena catenata	SAG 254.80	99.8962	99.3737	99.8962	99.7922	99.8962	99.7922	99.7922	98.1021	100
11	GU935358	Pseudanabaena sp.	Sai012	99.896	99.3724	99.896	99.7918	99.896	99.7918	99.7918	98.0981	100	100
12	MG767202	Pseudanabaena catenata	NIVA-CYA146	99.8962	99.3737	99.8962	99.7922	99.8962	99.7922	99.7922	98.1021	100	100	100
13	KM020005	Pseudanabaena catenata	SAG 1464	99.8962	99.3737	99.8962	99.7922	99.8962	99.7922	99.7922	98.1021	100	100	100	100
14	AB039020	Pseudanabaena catenata	PCC 7408	99.6877	99.1623	99.6877	99.5832	99.6877	99.5832	99.5832	97.8848	99.7919	99.7919	99.7914	99.7919	99.7919
15	ALWB01000102	Pseudanabaena biceps	PCC 7429	99.2692	99.5833	99.2692	99.164	99.2692	99.164	99.164	98.3162	99.3737	99.3737	99.3724	99.3737	99.3737	99.1623
16	LC016773	Pseudanabaena foetida var. foetida	PTG	97.6805	98.215	97.6805	97.7862	97.6805	97.7862	97.7862	97.6764	97.7872	97.7872	97.7825	97.7872	97.7872	97.5693	98.215
17	LC016779	Pseudanabaena foetida var. subfoetida	PS1306	97.6805	98.215	97.6805	97.7862	97.6805	97.7862	97.7862	97.6764	97.7872	97.7872	97.7825	97.7872	97.7872	97.5693	98.215	100
18	LC153790	Pseudanabaena foetida var. intermedia	NIES 512	98.1088	98.6392	98.1088	98.2145	98.1088	98.2145	98.2145	97.6764	98.215	98.215	98.2112	98.215	98.215	97.9994	98.6392	99.5833	99.5833
19	LC016776	Pseudanabaena limnetica	NIVA/CYA276-6	98.0021	98.5335	98.0021	98.1078	98.0021	98.1078	98.1078	97.9982	98.1084	98.1084	98.1044	98.1084	98.1084	97.8923	98.5335	99.6878	99.6878	99.6878
20	LC314124	Pseudanabaena yagii	NIVA-CYA111	97.0259	97.4626	97.0259	97.0296	97.1351	97.0296	97.0296	96.373	97.0278	97.0278	97.0215	97.0278	97.0278	96.8056	97.6786	97.3557	97.3557	97.4639	97.3557
21	LC314143	Pseudanabaena yagii	NIES-4237	97.7824	98.2131	97.7824	97.7851	97.8902	97.7851	97.7851	97.1363	97.7839	97.7839	97.7792	97.7839	97.7839	97.5653	98.4263	98	98	98.2139	98.107	99.1646
22	LC506589	Pseudanabaena yagii	NIES-4238	97.7824	98.2131	97.7824	97.7851	97.8902	97.7851	97.7851	97.1363	97.7839	97.7839	97.7792	97.7839	97.7839	97.5653	98.4263	98	98	98.2139	98.107	99.1646	100
23	LC506590	Pseudanabaena cinerea	NIES-4065	97.8951	97.4639	97.8951	98.0021	97.8951	98.0021	98.0021	96.3745	97.8945	97.8945	97.89	97.8945	97.8945	97.6772	97.6797	97.0312	97.0312	97.465	97.3569	97.3557	98.107	98.107
24	LC314122	Pseudanabaena cinerea	NIES-4063	97.8951	97.4639	97.8951	98.0021	97.8951	98.0021	98.0021	96.3745	97.8945	97.8945	97.89	97.8945	97.8945	97.6772	97.6797	97.0312	97.0312	97.465	97.3569	97.3557	98.107	98.107	100
25	LC314116	Pseudanabaena cinerea	Ak1548	97.8951	97.4639	97.8951	98.0021	97.8951	98.0021	98.0021	96.3745	97.8945	97.8945	97.89	97.8945	97.8945	97.6772	97.6797	97.0312	97.0312	97.465	97.3569	97.3557	98.107	98.107	100	100
26	LC314120	Pseudanabaena cinerea	Ak1349	97.8951	97.4639	97.8951	98.0021	97.8951	98.0021	98.0021	96.3745	97.8945	97.8945	97.89	97.8945	97.8945	97.6772	97.6797	97.0312	97.0312	97.465	97.3569	97.3557	98.107	98.107	100	100	100
27	KM386853	Pseudanabaena galeata	CHAB2916	97.8951	97.4639	97.8951	98.0021	97.8951	98.0021	98.0021	96.3745	97.8945	97.8945	97.89	97.8945	97.8945	97.6772	97.6797	97.0312	97.0312	97.465	97.3569	97.3557	98.107	98.107	100	100	100	100
28	MN128993	Pseudanabaena galeata	NRERC-312	97.8951	97.4639	97.8951	98.0021	97.8951	98.0021	98.0021	96.3745	97.8945	97.8945	97.89	97.8945	97.8945	97.6772	97.6797	97.0312	97.0312	97.465	97.3569	97.3557	98.107	98.107	100	100	100	100	100
29	LC085885	Pseudanabaena galeata	PB	97.8951	97.4639	97.8951	98.0021	97.8951	98.0021	98.0021	96.3745	97.8945	97.8945	97.89	97.8945	97.8945	97.6772	97.6797	97.0312	97.0312	97.465	97.3569	97.3557	98.107	98.107	100	100	100	100	100	100
30	KM386854	Pseudanabaena galeata	CHAB732	97.789	98.2152	97.789	97.6824	97.8959	97.6824	97.6824	96.8147	97.7892	97.7892	97.7846	97.7892	97.7892	97.5723	98.0027	97.8951	97.8951	98.3216	98.2153	97.5737	98.3214	98.3214	98.5311	98.5311	98.5311	98.5311	98.5311	98.5311	98.5311
31	KM386851	Pseudanabaena mucicola	CHAB7002	97.8902	98.3198	97.8902	97.8927	97.9977	97.8927	97.8927	97.1363	97.8915	97.8915	97.8871	97.8915	97.8915	97.6735	98.5325	97.8927	97.8927	98.3205	98.2139	99.0592	99.6878	99.6878	98.2139	98.2139	98.2139	98.2139	98.2139	98.2139	98.2139	98.4275
32	KM386852	Pseudanabaena mucicola	CHAB2966	97.8902	98.3198	97.8902	97.8927	97.9977	97.8927	97.8927	97.1363	97.8915	97.8915	97.8871	97.8915	97.8915	97.6735	98.5325	97.8927	97.8927	98.3205	98.2139	99.0592	99.6878	99.6878	98.2139	98.2139	98.2139	98.2139	98.2139	98.2139	98.2139	98.4275	100
33	KM386848	Pseudanabaena mucicola	CHAB717	97.8902	98.3198	97.8902	97.8927	97.9977	97.8927	97.8927	97.1363	97.8915	97.8915	97.8871	97.8915	97.8915	97.6735	98.5325	97.8927	97.8927	98.3205	98.2139	99.0592	99.6878	99.6878	98.2139	98.2139	98.2139	98.2139	98.2139	98.2139	98.2139	98.4275	100	100
34	KR912197	Pseudanabaena mucicola	PM201405	97.8902	98.3198	97.8902	97.8927	97.9977	97.8927	97.8927	97.1363	97.8915	97.8915	97.8871	97.8915	97.8915	97.6735	98.5325	97.8927	97.8927	98.3205	98.2139	99.0592	99.6878	99.6878	98.2139	98.2139	98.2139	98.2139	98.2139	98.2139	98.2139	98.4275	100	100	100
35	KM386849	Pseudanabaena mucicola	CHAB721	97.8857	98.3162	97.8857	97.8882	97.9935	97.8882	97.8882	97.1303	97.8871	97.8871	97.8826	97.8871	97.8871	97.6686	98.5295	97.8882	97.8882	98.3169	98.2101	99.0572	99.6872	99.6872	98.2101	98.2101	98.2101	98.2101	98.2101	98.2101	98.2101	98.4242	100	100	100	100
36	MN128994	Pseudanabaena mucicola	NRERC-306	97.8902	98.3198	97.8902	97.8927	97.9977	97.8927	97.8927	97.1363	97.8915	97.8915	97.8871	97.8915	97.8915	97.6735	98.5325	97.8927	97.8927	98.3205	98.2139	99.0592	99.6878	99.6878	98.2139	98.2139	98.2139	98.2139	98.2139	98.2139	98.2139	98.4275	100	100	100	100	100
37	KM020003	Pseudanabaena galeata	SAG 13.83	98.5311	98.8497	98.5311	98.4263	98.4246	98.4263	98.4263	97.6764	98.4255	98.4255	98.4222	98.4255	98.4255	98.2102	98.8497	98.85	98.85	99.2702	98.9554	98.1023	98.8468	98.8468	98.1061	98.1061	98.1061	98.1061	98.1061	98.1061	98.1061	98.4273	98.9528	98.9528	98.9528	98.9528	98.9506	98.9528
38	MN273769	Pseudanabaena galeata	CCNP1313	99.6881	99.164	99.6881	99.5839	99.6881	99.5839	99.5839	98.103	99.7922	99.7922	99.7918	99.7922	99.7922	99.5832	99.164	97.7879	97.7879	98.0021	98.1088	96.811	97.5694	97.5694	97.6805	97.6805	97.6805	97.6805	97.6805	97.6805	97.6805	97.5752	97.6774	97.6774	97.6774	97.6774	97.6725	97.6774	98.2131
39	KM386847	Pseudanabaena minima	CHAB705	99.0592	99.2692	99.0592	99.2685	99.0592	99.2685	99.2685	98.3169	99.0585	99.0585	99.0565	99.0585	99.0585	98.8456	99.2692	97.8937	97.8937	98.321	98.2145	97.2472	97.8927	97.8927	97.2486	97.2486	97.2486	97.2486	97.2486	97.2486	97.2486	97.7893	98.2139	98.2139	98.2139	98.2139	98.2101	98.2139	98.5325	98.8478
40	HQ132935	Pseudanabaena minima	GSE-PSE20-05C	98.9536	99.2701	98.9536	98.7434	98.8478	98.7434	98.7434	97.89	98.8486	98.8486	98.8462	98.8486	98.8486	98.6351	99.0598	98.5333	98.5333	98.7447	98.6391	97.5662	98.4235	98.4235	97.4626	97.4626	97.4626	97.4626	97.4626	97.4626	97.4626	98.2153	98.3167	98.3167	98.3167	98.3167	98.3131	98.3167	99.1646	98.6374	98.8492
41	MH522449	Pseudanabaenaceae cyanobacterium	GSE-PSE-MK15-19B	98.8478	99.1651	98.8478	98.6374	98.7417	98.6374	98.6374	97.7825	98.7427	98.7427	98.74	98.7427	98.7427	98.5286	98.9543	98.4273	98.4273	98.6391	98.5333	97.6744	98.5301	98.5301	97.5707	97.5707	97.5707	97.5707	97.5707	97.5707	97.5707	98.3216	98.4235	98.4235	98.4235	98.4235	98.4202	98.4235	99.0592	98.5311	98.7434	99.8962
42	MH522450	Pseudanabaenaceae cyanobacterium	GSE-PSE-MK21-19D	99.8962	99.3737	99.8962	99.7922	99.8962	99.7922	99.7922	98.1021	100	100	100	100	100	99.7919	99.3737	97.7872	97.7872	98.215	98.1084	97.0278	97.7839	97.7839	97.8945	97.8945	97.8945	97.8945	97.8945	97.8945	97.8945	97.7892	97.8915	97.8915	97.8915	97.8915	97.8871	97.8915	98.4255	99.7922	99.0585	98.8486	98.7427
43	AF132787	Pseudanabaena sp.	PCC 7402	98.8497	98.5311	98.8497	98.744	98.8497	98.744	98.744	97.0249	98.9548	98.9548	98.9526	98.9548	98.9548	98.7421	98.3179	97.7824	97.7824	98.2121	98.105	97.6727	98.4223	98.4223	98.105	98.105	98.105	98.105	98.105	98.105	98.105	98.0015	98.529	98.529	98.529	98.529	98.5259	98.529	98.6343	98.744	97.9977	98.4235	98.3167	98.9548
44	KY379872	Pseudanabaena sp.	CZS 35E	99.8962	99.3737	99.8962	99.7922	99.8962	99.7922	99.7922	98.1021	100	100	100	100	100	99.7919	99.3737	97.7872	97.7872	98.215	98.1084	97.0278	97.7839	97.7839	97.8945	97.8945	97.8945	97.8945	97.8945	97.8945	97.8945	97.7892	97.8915	97.8915	97.8915	97.8915	97.8871	97.8915	98.4255	99.7922	99.0585	98.8486	98.7427	100	98.9548
45	JF429939	Pseudanabaena sp.	dqh15	98.1088	98.6392	98.1088	98.2145	98.1088	98.2145	98.2145	97.6764	98.215	98.215	98.2112	98.215	98.215	97.9994	98.6392	99.5833	99.5833	100	99.6878	97.4639	98.2139	98.2139	97.465	97.465	97.465	97.465	97.465	97.465	97.465	98.3216	98.3205	98.3205	98.3205	98.3205	98.3169	98.3205	99.2702	98.0021	98.321	98.7447	98.6391	98.215	98.2121	98.215
46	AF132778	Pseudanabaena sp.	PCC 6903	98.8497	98.5311	98.8497	98.744	98.8497	98.744	98.744	97.0249	98.9548	98.9548	98.9526	98.9548	98.9548	98.7421	98.3179	97.7824	97.7824	98.2121	98.105	97.6727	98.4223	98.4223	98.105	98.105	98.105	98.105	98.105	98.105	98.105	98.0015	98.529	98.529	98.529	98.529	98.5259	98.529	98.6343	98.744	97.9977	98.4235	98.3167	98.9548	100	98.9548	98.2121
47	KM386857	Pseudanabaena limnetica	CHAB774	93.9393	94.395	93.9393	93.9435	94.0532	93.9435	93.9435	93.3676	93.9415	93.9415	93.9283	93.9415	93.9415	93.7063	94.395	94.7311	94.7311	94.9551	94.8432	94.6133	95.3945	95.3945	95.1693	95.1693	95.1693	95.1693	95.1693	95.1693	95.1693	95.3928	95.5057	95.5057	95.5057	95.5057	95.4961	95.5057	95.3959	93.9435	94.0571	94.7279	94.8403	93.9415	94.3871	93.9415	94.9551	94.3871
48	KM386856	Pseudanabaena limnetica	CHAB792	93.8275	94.2837	93.8275	93.8316	93.9415	93.8316	93.8316	93.2545	93.8296	93.8296	93.8162	93.8296	93.8296	93.5941	94.2837	94.6202	94.6202	94.8444	94.7325	94.5025	95.2846	95.2846	95.0593	95.0593	95.0593	95.0593	95.0593	95.0593	95.0593	95.283	95.3959	95.3959	95.3959	95.3959	95.3861	95.3959	95.286	93.8316	93.9454	94.6171	94.7296	93.8296	94.276	93.8296	94.8444	94.276
49	KM386855	Pseudanabaena limnetica	CHAB786	93.8275	94.2837	93.8275	93.8316	93.9415	93.8316	93.8316	93.2545	93.8296	93.8296	93.8162	93.8296	93.8296	93.5941	94.2837	94.6202	94.6202	94.8444	94.7325	94.5025	95.2846	95.2846	95.0593	95.0593	95.0593	95.0593	95.0593	95.0593	95.0593	95.283	95.3959	95.3959	95.3959	95.3959	95.3861	95.3959	95.286	93.8316	93.9454	94.6171	94.7296	93.8296	94.276	93.8296	94.8444	94.276
50	LC085884	Pseudanabaena limnetica	PG	93.9393	94.395	93.9393	93.9435	94.0532	93.9435	93.9435	93.3676	93.9415	93.9415	93.9283	93.9415	93.9415	93.7063	94.395	94.7311	94.7311	94.9551	94.8432	94.6133	95.3945	95.3945	95.1693	95.1693	95.1693	95.1693	95.1693	95.1693	95.1693	95.3928	95.5057	95.5057	95.5057	95.5057	95.4961	95.5057	95.3959	93.9435	94.0571	94.7279	94.8403	93.9415	94.3871	93.9415	94.9551	94.3871
51	MN833625	Thalassoporum komareki	TAU-MAC 1515	88.4024	88.1462	88.4024	88.6407	88.4024	88.6407	88.6407	89.2199	88.3968	88.3968	88.3705	88.3968	88.3968	88.1327	88.2716	88.516	88.516	88.2657	88.391	88.385	88.5216	88.5216	88.516	88.516	88.516	88.516	88.516	88.516	88.516	88.0379	88.5216	88.5216	88.5216	88.5216	88.4957	88.5216	88.2774	88.6407	88.8891	87.7863	87.7863	88.3968	88.2716	88.3968	88.2657	88.2716
52	AF091108	Pseudanabaena sp.	PCC 7367	87.9005	87.6411	87.9005	88.0264	87.9005	88.0264	88.0264	88.8473	87.8943	87.8943	87.8667	87.8943	87.8943	87.627	87.7678	87.7742	87.7742	87.6476	87.7742	87.5272	88.0204	88.0204	88.1401	88.1401	88.1401	88.1401	88.1401	88.1401	88.1401	87.5335	88.2716	88.2716	88.2716	88.2716	88.245	88.2716	87.9005	88.1401	88.4024	87.1518	87.1518	87.8943	87.7678	87.8943	87.6476	87.7678
53	KU951798	Pseudanabaena cf. curta	LEGE 10371	88.245	88.1131	88.245	88.3587	88.245	88.3587	88.3587	88.6001	88.3647	88.3647	88.3383	88.3647	88.3647	88.0996	88.2391	88.4957	88.4957	88.1193	88.245	88.3524	88.2391	88.2391	88.2329	88.2329	88.2329	88.2329	88.2329	88.2329	88.2329	87.879	88.3647	88.3647	88.3647	88.3647	88.3383	88.3647	88.1193	88.6093	88.6093	87.6258	87.6258	88.3647	88.2391	88.3647	88.1193	88.2391
54	AB039019	Pseudanabaena sp.	PCC 7403	91.2733	91.2693	91.2733	91.5037	91.2733	91.5037	91.5037	91.4808	91.2693	91.2693	91.2499	91.2693	91.2693	91.0198	91.0298	91.6145	91.6145	91.6145	91.7334	92.455	91.7449	91.7449	91.5114	91.5114	91.5114	91.5114	91.5114	91.5114	91.5114	91.7484	91.981	91.981	91.981	91.981	91.9634	91.981	91.3925	91.2651	91.6226	91.2808	91.3997	91.2693	91.5077	91.2693	91.6145	91.5077
55	AB039016	Pseudanabaena sp.	PCC 6802	91.0427	91.1587	91.0427	91.1554	91.0427	91.1554	91.1554	90.4322	91.1587	91.1587	91.1391	91.1587	91.1587	90.9097	90.9198	90.8101	90.8101	90.8101	90.9296	91.6383	91.3966	91.3966	91.5121	91.5121	91.5121	91.5121	91.5121	91.5121	91.5121	91.2863	91.7512	91.7512	91.7512	91.7512	91.733	91.7512	91.1619	91.2745	91.5121	90.8101	90.9296	91.1587	91.3966	91.1587	90.8101	91.3966
[truncated: 9 more columns]

## Sheet: Table S5
Table S5. 16S–23S ITS percent dissimilarity matrix (100 × p-distance) for members of the Pseudanabaena clade and Thalassoporum.The p-distance was calculated in MEGA 7 using the Kimura-2 parameter model. Percent dissimi-larity values are less than 3% within species and above 7% between species. Intermediate values (3–7%) are considered ambiguous.
	Taxon name		1	2	3	4	5	6	7	8	9	10	11	12	13	14	15	16	17	18	19	20	21	22	23	24	25	26	27	28	29	30	31	32	33	34	35	36	37	38
1	Pseudanabaena epilithica sp. nov	UHCC 1008
2	Pseudanabaena suomiensis sp. nov	UHCC 1009	7.69602
3	Pseudanabaena sp.	BACA0266	1.40524	8.22936
4	Pseudanabaena catenata	SAG 254.80	13.105	13.0404	13.9696
5	Pseudanabaena catenata	NIVA-CYA146	12.8078	11.9254	13.9507	5.75125
6	Pseudanabaena sp.	Sai012	13.9146	13.5476	14.7868	0.89126	6.23166
7	Pseudanabaena sp.	PS1303	13.105	11.9403	13.9696	1.57	5.27009	2.02422
8	Pseudanabaena limnetica	Ak1199	13.105	11.9403	13.9696	1.57	5.27009	2.02422	0
9	Pseudanabaena sp.	Ak1201	12.2659	9.54961	13.1255	5.14647	8.8279	5.61163	5.38521	5.38521
10	Pseudanabaena limnetica	LIM1	12.2659	9.54961	13.1255	5.14647	8.8279	5.61163	5.38521	5.38521	0
11	Pseudanabaena limnetica	Lim1	12.2659	9.54961	13.1255	5.14647	8.8279	5.61163	5.38521	5.38521	0	0
12	Pseudanabaena sp.	PCC 6903	12.8464	13.2922	13.706	4.58765	7.70626	5.07519	4.58285	4.58285	7.89324	7.89324	7.89324
13	Pseudanabaena sp.	CZS-35E	11.1567	8.49594	12.2772	7.7096	4.86751	8.20422	7.4542	7.4542	6.58159	6.58159	6.58159	8.73114
14	Pseudanabaena yagii	NIES-4237	11.9067	12.2299	13.024	8.39124	6.33367	8.85511	7.88504	7.88504	10.0042	10.0042	10.0042	8.66395	6.35629
15	Pseudanabaena yagii	NIES-4238	11.9067	12.2299	13.024	8.39124	6.33367	8.85511	7.88504	7.88504	10.0042	10.0042	10.0042	8.66395	6.35629	0
16	Pseudanabaena yagii	NIVA-CYA111	11.6822	13.1196	11.9647	8.41943	7.33072	9.42342	8.16068	8.16068	9.83921	9.83921	9.83921	8.96219	8.92433	4.71602	4.71602
17	Pseudanabaena foetida var. foetida	PTG	13.7266	13.1307	13.7266	11.8807	9.24802	12.6799	12.6799	12.6799	14.7751	14.7751	14.7751	13.7759	7.84728	10.577	10.577	12.6416
18	Pseudanabaena foetida var. subfoetida	PS1306	9.86526	11.8522	9.33615	13.5565	13.8249	14.3495	14.1156	14.1156	14.4662	14.4662	14.4662	15.5511	13.2832	13.8565	13.8565	13.6486	9.82075
19	Pseudanabaena foetida var. intermedia	NIES 512	12.6014	12.5932	12.6014	11.0981	9.0238	12.1578	12.1578	12.1578	14.2414	14.2414	14.2414	13.2477	7.62505	10.7965	10.7965	13.1871	2.69009	11.1179
20	Pseudanabaena limnetica	NIVA-CYA276/6	8.83828	10.32	8.31608	13.8312	13.8249	14.628	13.8386	13.8386	14.4662	14.4662	14.4662	15.5511	13.2832	14.6195	14.6195	14.4775	10.3233	1.55118	10.5916
21	Pseudanabaena mucicola	CHAB2966	12.6253	13.1772	12.0698	13.4996	11.3127	13.9613	13.489	13.489	13.5329	13.5329	13.5329	14.6365	12.4041	9.29141	9.29141	10.4235	14.9775	16.0039	14.2287	15.4931
22	Pseudanabaena mucicola	CHAB7002	12.3536	13.1809	11.7996	13.5113	11.3276	13.9724	13.4996	13.4996	13.5447	13.5447	13.5447	14.6503	12.4163	9.30064	9.30064	10.1649	14.9853	16.0136	14.2364	15.5023	0.194837
23	Pseudanabaena cinerea	NIES-4065	15.7794	18.2404	16.0718	16.2549	14.8809	16.9995	16.8424	16.8424	15.7778	15.7778	15.7778	17.722	12.935	12.3648	12.3648	14.1732	14.1405	18.2885	14.5904	18.2778	16.001	16.0135
24	Pseudanabaena cinerea	NIES-4063	15.4887	17.9506	15.7794	16.2549	15.142	16.9995	16.8424	16.8424	15.7778	15.7778	15.7778	17.722	13.1882	12.616	12.616	14.1732	14.3996	17.9987	14.8481	17.9888	15.7433	15.7551	0.2
25	Pseudanabaena cinerea	Ak1349	15.4887	17.9506	15.7794	16.2549	15.142	16.9995	16.8424	16.8424	15.7778	15.7778	15.7778	17.722	13.1882	12.616	12.616	14.1732	14.3996	17.9987	14.8481	17.9888	15.7433	15.7551	0.2	0
26	Pseudanabaena galeata	PB	15.4887	17.9506	15.7794	16.2549	15.142	16.9995	16.8424	16.8424	15.7778	15.7778	15.7778	17.722	13.1882	12.616	12.616	14.1732	14.3996	17.9987	14.8481	17.9888	15.7433	15.7551	0.2	0	0
27	Pseudanabaena galeata	CHAB2916	16.1873	18.1015	16.4823	12.8466	14.8167	13.5795	13.4128	13.4128	13.1853	13.1853	13.1853	15.6857	15.1329	13.9957	13.9957	14.2093	15.8722	17.5652	16.1005	17.8899	15.7616	15.7699	6.09674	6.09674	6.09674	6.09674
28	Pseudanabaena galeata	SAG 13.83	9.38917	10.2377	9.38917	14.7217	14.9953	15.5134	15.011	15.011	14.1707	14.1707	14.1707	15.5996	14.9953	13.3404	13.3404	12.9111	15.4142	10.4436	14.3176	9.68579	14.5757	14.5784	14.8787	14.6091	14.6091	14.6091	16.404
29	Pseudanabaena galeata	CCNP1313	11.1567	8.49594	12.2772	7.7096	4.86751	8.20422	7.4542	7.4542	6.58159	6.58159	6.58159	8.73114	0	6.35629	6.35629	8.92433	7.84728	13.2832	7.62505	13.2832	12.4041	12.4163	12.935	13.1882	13.1882	13.1882	15.1329	14.9953
30	Pseudanabaena minima	GSE-PSE20-05C	13.3664	11.8958	14.236	7.87437	9.59029	8.34852	7.35372	7.35372	5.10953	5.10953	5.10953	7.90462	7.3316	8.99072	8.99072	9.07601	13.9363	16.6795	13.9257	16.9259	13.7541	13.7644	15.1831	15.1831	15.1831	15.1831	13.9955	16.0555	7.3316
31	Pseudanabaena minima	CHAB705	9.81782	12.7519	10.0896	5.82044	7.99039	6.77833	5.81185	5.81185	6.12964	6.12964	6.12964	7.29348	7.26742	8.90406	8.90406	10.0665	13.0062	13.8196	11.6706	13.7855	12.7424	12.7549	16.1737	16.1737	16.1737	16.1737	13.0706	14.6731	7.26742	6.11337
32	Pseudanabaenaceae cyanobacterium	GSE-PSE-MK15-19B	13.3664	11.8958	14.236	7.87437	9.59029	8.34852	7.35372	7.35372	5.10953	5.10953	5.10953	7.90462	7.3316	8.99072	8.99072	9.07601	13.9363	16.6795	13.9257	16.9259	13.7541	13.7644	15.1831	15.1831	15.1831	15.1831	13.9955	16.0555	7.3316	0	6.11337
33	Pseudanabaenaceae cyanobacterium	GSE-PSE-MK21-19D	11.6839	10.0434	11.9641	6.61647	9.84896	6.83287	5.85855	5.85855	4.14971	4.14971	4.14971	7.87437	7.06948	9.73049	9.73049	10.0971	13.6305	14.4064	13.3701	14.1294	13.5113	13.524	17.172	17.172	17.172	17.172	13.9955	14.1206	7.06948	5.60579	5.38015	5.60579
34	Pseudanabaena biceps	PCC 7429	12.7805	15.0886	13.6353	4.52762	8.24063	5.48805	5.28136	5.28136	8.34029	8.34029	8.34029	7.57921	10.622	9.57609	9.57609	9.68553	13.2119	13.1524	12.1388	13.1598	11.5182	11.5237	12.2998	12.2998	12.2998	12.2998	10.3805	10.471	10.622	8.60554	6.2607	8.60554	8.86162
35	Pseudanabaena limnetica	CHAB774	40.0144	38.9485	39.1215	37.8561	37.5136	38.5563	37.7359	37.7359	39.511	39.511	39.511	38.8987	38.7256	38.1678	38.1678	34.7485	40.5872	43.6024	40.3874	43.9247	37.0433	37.0799	37.5886	38.0215	38.0215	38.0215	38.8223	39.8083	38.7256	38.0988	40.0878	38.0988	40.0401	37.0119
36	Pseudanabaena limnetica	CHAB786	41.022	39.4868	40.1046	37.9465	38.9303	37.7797	37.8256	37.8256	39.5956	39.5956	39.5956	39.9028	40.1691	39.6272	39.6272	35.7343	42.5879	44.6729	42.3348	44.9803	38.4118	38.4582	37.2473	37.6802	37.6802	37.6802	38.9114	40.8361	40.1691	38.1906	40.6443	38.1906	40.1376	37.533	2.65931
37	Pseudanabaena limnetica	CHAB792	40.1046	39.0384	39.2037	37.9465	38.0453	37.7797	37.8256	37.8256	39.5956	39.5956	39.5956	39.0019	38.8237	37.8333	37.8333	34.8532	40.7008	43.7114	40.4827	44.0233	36.6949	36.7339	37.2473	37.6802	37.6802	37.6802	38.4689	39.9144	38.8237	38.1906	40.1898	38.1906	40.1376	37.0964	1.19221	2.67054
38	Pseudanabaena limnetica	PG	40.0144	38.9485	39.1215	37.8561	37.5136	38.5563	37.7359	37.7359	39.511	39.511	39.511	38.8987	38.7256	38.1678	38.1678	34.7485	40.5872	43.6024	40.3874	43.9247	37.0433	37.0799	37.5886	38.0215	38.0215	38.0215	38.8223	39.8083	38.7256	38.0988	40.0878	38.0988	40.0401	37.0119	0	2.65931	1.19221
39	Thalassoporum komareki	TAU-MAC 1515	52.4388	53.9047	53.034	46.3377	47.413	47.0672	48.4531	48.4531	48.9692	48.9692	48.9692	46.4303	48.3397	46.5582	46.5582	47.5441	55.0933	54.2256	53.2183	54.8284	53.0681	53.0681	50.4989	50.4989	50.4989	50.4989	52.9392	51.1547	48.3397	48.7862	49.1798	48.7862	50.6836	45.838	42.9144	45.1108	42.4924	42.9144

## Sheet: Table S6
Table S6. Lengths of conserved domains of the 16S-23S Internal Transcribed Space (ITS) of Pseudanabaena species and Thalassoporum. -; missing information due to incomplete 16S-23S ITS nucleotide sequence.
	Taxon name		Leader	D1 stem	spacer + D2 + spacer	D3 + spacer	tRNA Ile	spacer + V2 + spacer	tRNA Ala	pre-boxB spacer	Box B	post box B spacer	BoxA	D4 + spacer	V3	spacer + D5 + end
1	Pseudanabaena epilithica sp. nov	UHCC 1008	7	63	36	21	74	38	76	37	47	28	13	13	12	26
2	Pseudanabaena suomiensis sp. nov	UHCC 1009	7	63	36	51	74	48	73	32	47	28	13	13	12	26
3	Pseudanabaena sp.	BACA0266	7	63	36	21	74	38	77	36	46	28	13	13	12	26
4	Pseudanabaena catenata	SAG 254.80	7	63	36	24	74	51	76	40	47	28	13	13	12	-
5	Pseudanabaena catenata	NIVA-CYA146	7	63	36	24	74	96	76	40	47	28	13	13	12	-
6	Pseudanabaena sp.	Sai012	7	63	37	23	74	51	76	41	48	28	13	-	-	-
7	Pseudanabaena sp.	PS1303	7	63	36	24	74	51	76	46	47	28	13	13	12	-
8	Pseudanabaena limnetica	Ak1199	7	63	36	24	74	51	76	46	47	28	13	13	12	-
9	Pseudanabaena sp.	Ak1201	7	63	36	24	74	51	76	36	47	28	13	13	12	-
10	Pseudanabaena limnetica	LIM1	7	63	36	24	74	51	76	36	47	28	13	13	12	26
11	Pseudanabaena limnetica	Lim1	7	63	36	24	74	51	76	36	47	28	13	13	12	26
12	Pseudanabaena sp.	PCC 6903	7	63	36	24	74	51	76	39	47	28	13	13	12	26
13	Pseudanabaena sp.	CZS 35E	7	63	36	24	74	88	76	40	47	28	13	13	12	26
14	Pseudanabaena yagii	NIES-4237	7	63	36	24	74	87	76	41	46	29	13	15	13	26
15	Pseudanabaena yagii	NIES-4238	7	63	36	24	74	87	76	41	46	29	13	14	13	26
16	Pseudanabaena yagii	NIVA-CYA111	7	63	36	24	74	37	76	41	55	28	13	15	13	26
17	Pseudanabaena foetida var. foetida	PTG	7	63	36	32	74	88	76	36	46	28	13	13	12	26
18	Pseudanabaena foetida var. subfoetida	PS1306	7	63	36	33	74	48	76	39	47	28	13	13	12	26
19	Pseudanabaena foetida var. intermedia	NIES 512	7	63	36	32	74	88	76	36	46	27	13	13	12	26
20	Pseudanabaena limnetica	NIVA/CYA276-6	7	63	36	32	74	48	76	39	47	29	13	13	12	26
21	Pseudanabaena mucicola	CHAB2966	7	63	36	36	74	95	76	36	57	28	13	15	14	-
22	Pseudanabaena mucicola	CHAB7002	7	63	36	36	74	95	76	36	57	28	13	15	14	26
23	Pseudanabaena cinerea	NIES-4065	7	63	37	37	74	88	76	39	45	29	13	15	12	26
24	Pseudanabaena cinerea	NIES-4063	7	63	37	37	74	88	76	39	45	29	13	15	12	26
25	Pseudanabaena cinerea	Ak1349	7	63	37	37	74	88	76	39	45	29	13	15	12	26
26	Pseudanabaena galeata	PB	7	63	37	37	74	88	76	39	45	29	13	15	12	26
27	Pseudanabaena galeata	CHAB2916	7	63	37	37	74	51	76	39	45	28	13	15	13	26
28	Pseudanabaena galeata	SAG 13.83	7	63	36	47	74	48	75	36	47	29	13	13	12	41
29	Pseudanabaena galeata	CCNP1313	7	63	36	24	74	88	76	40	47	28	13	13	12	-
30	Pseudanabaena minima	GSE-PSE20-05C	7	63	36	26	74	51	76	36	46	28	13	13	12	26
31	Pseudanabaena minima	CHAB705	7	63	31	29	74	52	76	40	46	26	13	13	12	-
32	Pseudanabaenaceae cyanobacterium	GSE-PSE-MK15-19B	7	63	37	25	74	51	76	36	46	28	13	13	12	26
33	Pseudanabaenaceae cyanobacterium	GSE-PSE-MK21-19D	7	63	31	29	74	52	76	36	47	28	13	13	12	26
34	Pseudanabaena biceps	PCC 7429	7	63	37	26	74	51	76	36	46	29	13	13	12	26
35	Pseudanabaena limnetica	CHAB774	7	63	31	16	74	45	76	31	52	22	13	10	14	53
36	Pseudanabaena limnetica	CHAB786	7	63	31	16	74	45	76	31	52	22	13	10	14	53
37	Pseudanabaena limnetica	CHAB792	7	63	31	16	74	45	76	31	52	22	13	10	14	53
38	Pseudanabaena limnetica	PG	7	63	31	16	74	45	76	31	52	22	13	10	14	53
39	Thalassoporum komareki	TAU-MAC 1515	7	67	48	21	74	4	76	51	53	15	13	9	33
